# Supplementary material
Source: PubMed Central journal article supplement (PMC3928807)
Supplement: mmc1.pdf [file mmc1.pdf]

The American Journal of Human Genetics, Volume 94  
Supplemental Data

## **Integrin Alpha 8 Recessive Mutations Are Responsible for Bilateral Renal Agenesis in Humans**

**Camille Humbert, Flora Silbermann, Bharti Morar, Mélanie Parisot, Mohammed  
Zarhrate, Cécile Masson, Frédéric Tores, Patricia Blanchet, Marie-José Perez, Yuliya  
Petrov, Philippe Khau Van Kien, Joelle Roume, Brigitte Leroy, Olivier Gribouval, Luba  
Kalaydjieva, Laurence Heidet, Rémi Salomon, Corinne Antignac, Alexandre Benmerah,  
Sophie Saunier, and Cécile Jeanpierre**

Family F1 M1: c.2982+2T>C  
(p.Arg961\_Ala994del)

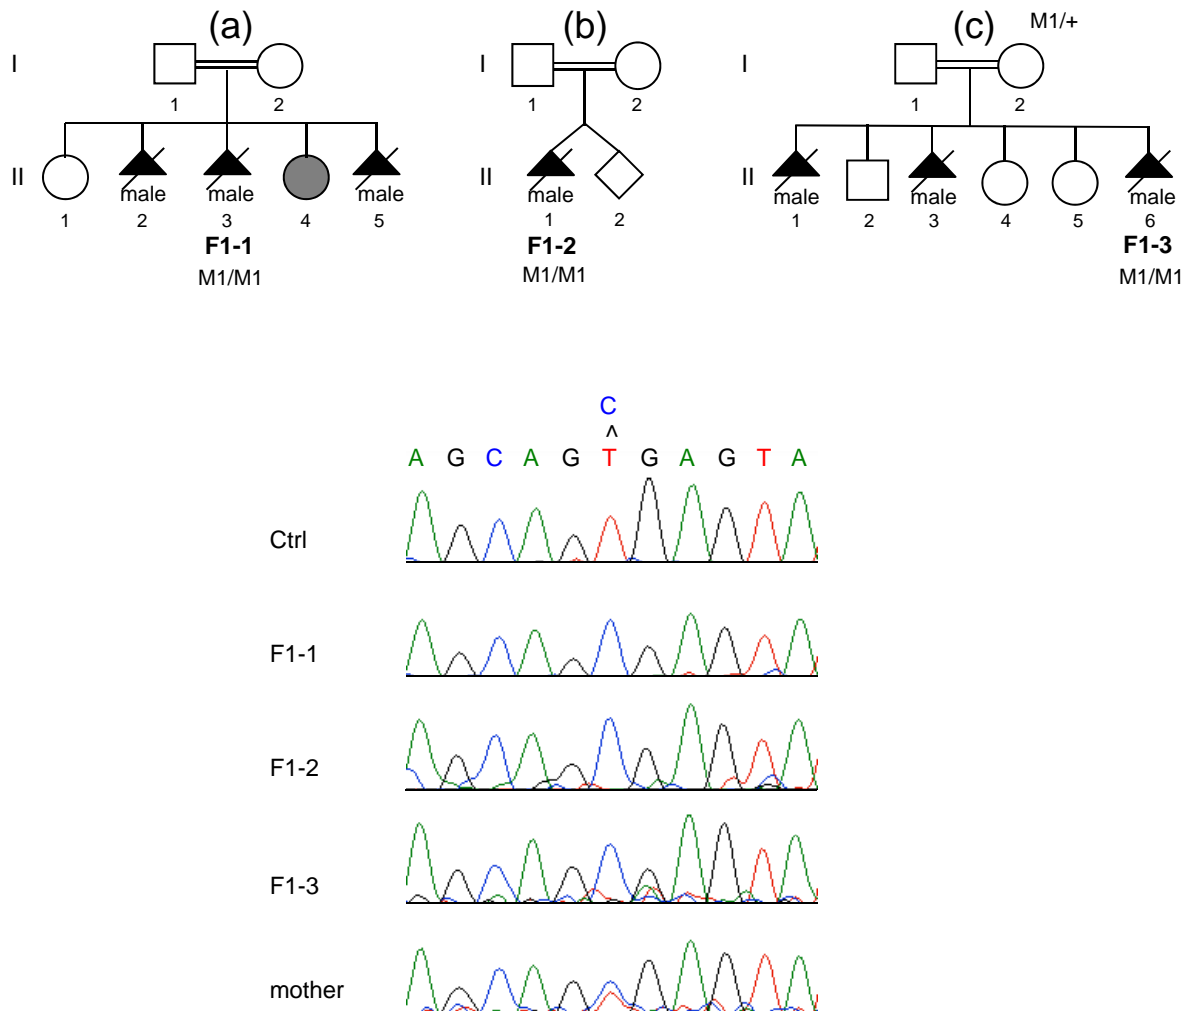

**Figure S1.** Pedigrees of the three branches of family F1 (a, b and c) showing the studied samples: F1-1 (II-3 in pedigree a), F1-2 (II-1 in pedigree b), F1-3 (II-6 in pedigree c) and the mother of fetus F1-3 (I-2 in pedigree c). Presence of the mutation in the three fetuses (homozygous) and the mother (heterozygous) is visualized on Sanger sequencing chromatograms.

| Gene                                          | Name                                      | Variant position                            | Sequence       | Nucleotidic change                 | Class of mutation                | Protein change                            | Polyphen2/Sift               | ho/he          |
|-----------------------------------------------|-------------------------------------------|---------------------------------------------|----------------|------------------------------------|----------------------------------|-------------------------------------------|------------------------------|----------------|
| <u>Family F1/case F1-1(WES)</u>               |                                           |                                             |                |                                    |                                  |                                           |                              |                |
| <b><i>ITGA8</i></b>                           | Integrin $\alpha$ 8                       | 10:15570047                                 | NM_003638.1    | c.2982+2T>C                        | 5'-splice                        | p.Arg961_Ala994del                        | -                            | ho             |
| <i>FFAR4</i>                                  | free fatty acid receptor 4                | 10:95347195                                 | NM_001195755.1 | c.915G>T                           | missense                         | p.Trp305Cys                               | 0.982/0.02                   | ho             |
| <i>ASB11</i>                                  | ankyrin repeat and SOCS box containing 11 | X:15301701                                  | NM_001012428.2 | c.835G>A                           | missense                         | p.Gly279Ser                               | 0.999/0                      | Hem            |
| <u>Family F2/cases F2-1 and F2-2 (WES)</u>    |                                           |                                             |                |                                    |                                  |                                           |                              |                |
| <i>ZSCAN20</i>                                | zinc finger and SCAN domain containing 20 | 1:33944890<br>1:33957219                    | NM_145238.3    | c.1A>G<br>c.1361G>A                | start loss<br>missense           | p.Met1Val<br>p.Cys454Tyr                  | -<br>0.992/0                 | he<br>he       |
| <b><i>ITGA8</i></b>                           | Integrin $\alpha$ 8                       | 10:15649814                                 | NM_003638.1    | c.1622_1626del<br>AGGTG            | frameshift                       | p.Glu541Alafs*12                          | -                            | he             |
| <i>CCDC153</i>                                | coiled-coil domain containing 153         | 10:15686209<br>11:119061052<br>11:119063873 | NM_001145018.1 | c.1219 G>A<br>c.590T>C<br>c.337C>T | missense<br>missense<br>missense | p.Gly407Arg<br>p.Leu197Pro<br>p.Arg113Trp | 1/0,01<br>0.853/0<br>0.892/0 | he<br>he<br>he |
| <i>NACAD</i>                                  | NAC alpha domain containing               | 7:45121237<br>7:45125615                    | NM_001146334.1 | c.4220A>G<br>c.164C>T              | missense<br>missense             | p.Lys1407Arg<br>p.Thr55Met                | 0.499/0<br>0.518/0.02        | he<br>he       |
| <u>Simplex case BRA-1 (Sanger sequencing)</u> |                                           |                                             |                |                                    |                                  |                                           |                              |                |
| <b><i>ITGA8</i></b>                           | Integrin $\alpha$ 8                       | 10:15714661                                 | NM_003638.1    | c.764 C>T                          | missense                         | p.Thr255Met                               | 0.999/0.00                   | he             |

ho: homozygous, he: heterozygous, Hem: hemizygous

**Table S1.** Mutations identified by Whole Exome Sequencing and Sanger sequencing
